# Supplementary material for: Effects of Lysophosphatidylcholine on Intestinal Health of Turbot Fed High-Lipid Diets
Source: MDPI journal article supplement (doi:10.3390/nu14204398), 2022-10-20
Supplement: s1 [file s1]

# Effects of lysophosphatidylcholine on intestinal health of turbot fed high-lipid diets

Sihui Li <sup>1</sup>, Xing Luo <sup>2</sup>, Zhangbin Liao <sup>2</sup>, Mengqing Liang <sup>2,3</sup>, Houguo Xu <sup>2,3,\*</sup>, Kangsen Mai <sup>1,3</sup> and Yanjiao Zhang <sup>1,3,\*</sup>

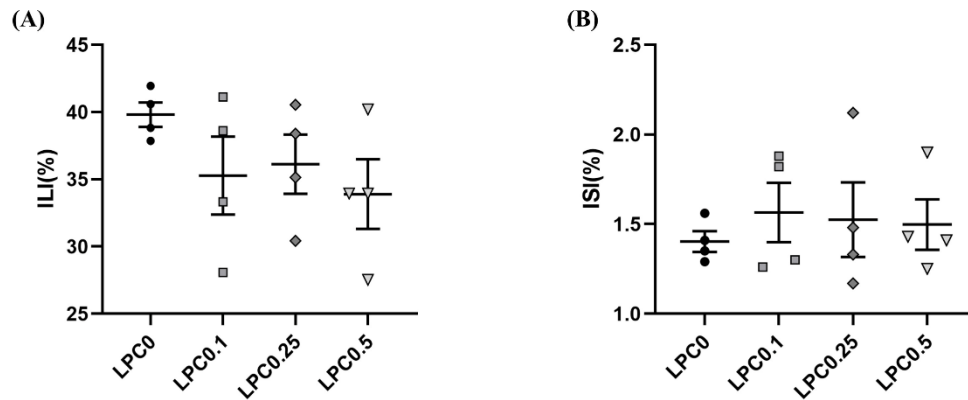

**Figure S1.** Intestinal length index (ILI) and intestinal somatic index (ISI) of turbot.

## *Clostridium perfringens*

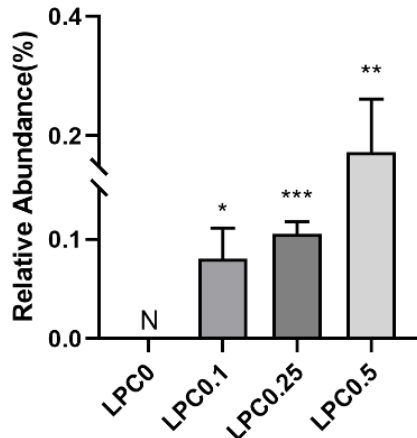

**Figure S2.** Effect of dietary LPC on the abundance of *Clostridium perfringens* in distal intestine of turbot.

\*means significant difference between the LPC0 group and the LPC0.1, LPC0.25 or LPC0.5 group as evaluated by T-test (\* $P < 0.05$ , \*\*  $P < 0.01$ , \*\*\*  $P < 0.001$ ).

**Table S1.** Primers used for quantitative real-time PCR analysis.

| Target Genes   | Sequence (5'-3')                                         | Accession umber    |
|----------------|----------------------------------------------------------|--------------------|
| AP-1           | F: CAGCTGCGGCTTGAAGTTTT<br>R: GTTCTACGACGAAGCCGTGA       | (Zhao et al.,2019) |
| Bax            | F: AGCATCTTTGCTGACGGGAT<br>R: GCGCTCTCTGATGACCTGAA       | MN782169           |
| Bcl-2          | F: TTCCTCAACTCTCAAAGCACAATTC<br>R: ATTACACTCGCTCGCCATTCC | MN782168           |
| Caspase-3      | F: TTCTGCCATTGTCTCTGTGC<br>R: GCCCTGCAACATAAAGCAAC       | JU391554.1         |
| Caspase-9      | F: CCCAGGACATGATCGACGAG<br>R: ACAATGGGAAGGCTCGACTG       | XM_035644988.1     |
| ERK            | F: TCAACCACATACTGGGCATCC<br>R: TCGAGTCGGCCTTGAAGAA       | (Zhao et al.,2019) |
| IFN- $\gamma$  | F: GCTTTCCCGATCATCTTCTG<br>R: GGTTTCCCAGATTCCCATTC       | DQ400686.1         |
| IL-1 $\beta$   | F: CGCTTCCCCAACTGGTACAT<br>R: ACCTTCCACTTTGGGTCGTC       | XM_035640817       |
| IRF3           | F: TGGGAGAAGAACTCATCACA<br>R: ACATCTCCATCATCTCTTCCA      | HQ424131.1         |
| JNK            | F: CAGCCAACAGACCAGACA<br>R: TGAAGCCCAGTAACATCG           | (Zhao et al.,2019) |
| MyD88          | F: CCCAATGGTAGCCCTGAGAT<br>R: CATCTCGGTCGAACACACAC       | KP985236.1         |
| NF- $\kappa$ B | F: AACTGCTGAGCTGAAGATC<br>R: CTCTGAGCCCATCAGGGTC         | MF370855           |
| PCNA           | F: CTCGTACCGCTGCGACAG<br>R: CAGAGGGCATCTTCACCAC          | EU711051.1         |
| p38            | F: GACGAACCCTGTTTCCTGGT<br>R: TCGGCTGCTGTTATTCGCTT       | (Zhao et al.,2019) |
| TGF- $\beta$ 1 | F: CTGCAGGACTGGCTCAAAGG<br>R: CATGGTCAGGATGTATGGTGGT     | KU238187.1         |
| TLR2           | F: AGGAGCCAAGGGAGACCGAT<br>R: GGCGCTCATGATGTTGTCC        | KU746963.1         |
| TLR3           | F: TGGTGTCGTCGATTCAAAGC<br>R: CCAATCCAACACTCCCCACG       | KX216854.1         |
| TLR5a          | F: AGTCTCTTTGGTCTCAGGGC<br>R: TTTGGGTAAGACATCGGGCT       | KX525706           |
| TLR5b          | F: AACAACTTCCTAGCCTCCCC<br>R: CATGTGAAATCCTCCGCTGG       | KX525707           |
| TLR8           | F: ACAGATCCTTGAAC TCCCCG                                 | KX708702.1         |

---

|                |                                                                               |            |
|----------------|-------------------------------------------------------------------------------|------------|
| TLR9           | R: TCCAATCCCTCTCCTCCAGA<br>F: AAGGCTCTGAGGGGAAAGAC<br>R: TTCTTCACAGAGCTGAGGGG | KU746969.1 |
| TLR21          | F: CAGCTGTCATCCTATCACCG<br>R: TTGTCATTGCCCTGCGTAG                             | KU746965.1 |
| TLR22          | F: ACAGAGACTTCGAGCCAGGT<br>R: CTTGTTCGGCAGTTTCCTCA                            | KJ606344.1 |
| TNF- $\alpha$  | F: GGACAGGGCTGGTACAACAC<br>R: TTCAATTAGTGCCACGACAAAGAG                        | AJ295836.2 |
| $\beta$ -actin | F: CGTGCGTGACATCAAGGAG<br>R: AGGAAGGAAGGCTGGAAGAG                             | AY008305.1 |

---

Abbreviations: AP-1 activator protein-1; Bax B-cell lymphoma associated X; Bcl-2 B-cell lymphoma-2; Caspase cysteine-aspartic protease; ERK extracellular regulated kinase; IFN- $\gamma$  interferon- $\gamma$ ; IL interleukin; IRF interferon regulatory factor; JNK c-Jun N-terminal kinase; MyD88 myeloid differentiation factor 88; NF- $\kappa$ B nuclear transcription factor-kappa B; PCNA proliferating cell nuclear antigen; p38 p38 mitogen-activated protein kinase; TGF- $\beta$ 1 transforming growth factor- $\beta$ 1; TLR toll like receptor; TNF- $\alpha$  tumor necrosis factor- $\alpha$ .

---

**Table S2.** AMOVA test of distal intestine ( $n=4$ ).

| Groups          | LPC0-LPC0.1 | LPC0-LPC0.25 | LPC0-LPC0.5 |
|-----------------|-------------|--------------|-------------|
| <i>P</i> -value | 0.026*      | 0.006*       | 0.028*      |

\* means significant difference between the LPC0 group and LPC-supplemented groups ( $P < 0.05$ ).
